# Supplementary material for: Toll-like receptor 3 modified Au electrodes: an investigation into the interaction of TLR3 immobilized on Au surfaces with poly(I:C)
Source: Royal Society of Chemistry journal article supplement (doi:10.1039/c4ay00369a), 2014-01-01
Supplement: c4ay00369a1.pdf [file c4ay00369a1.pdf]

**Toll-Like Receptor 3 modified Au electrodes: an investigation into  
the interaction of TLR3 immobilized on Au surfaces with poly (I:C)**

**“Supplementary Information”**

Kaveh Amini,<sup>a</sup> Nora W. C. Chan<sup>b</sup> and Heinz-Bernhard Kraatz<sup>a,\*</sup>

*<sup>a</sup> Department of Physical and Environmental Sciences, University of Toronto  
Scarborough, 1265 Military Trail, Toronto, ON, M1C 1A4, Canada*

*<sup>b</sup> Defence Research and Development Canada Suffield, PO Box 4000, Station Main,  
Medicine Hat, AB, T1A 8K6, Canada*

\* Corresponding author email: [bernie.kraatz@utoronto.ca](mailto:bernie.kraatz@utoronto.ca); fax: (+1) 416-287-7279

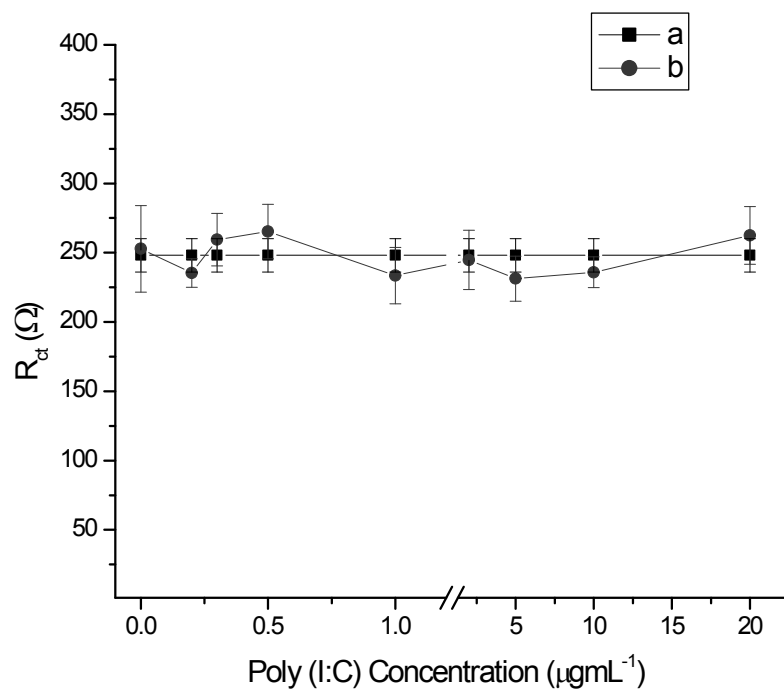

**Fig. S1** Investigation of the electrochemical behaviour of the Lip-NHS modified Au electrode with poly (I:C). (a) Shows the  $R_{ct}$  value obtained for incubation in the absence of poly (I:C) and has been provided for comparison and (b) show the  $R_{ct}$  values for incubation at different concentrations of poly (I:C)

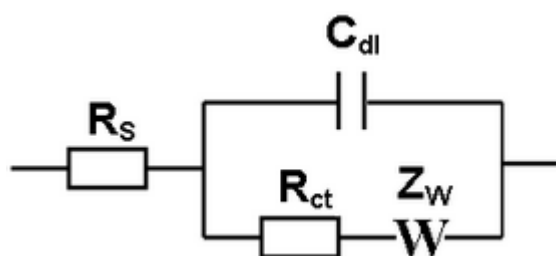

**Scheme S1.** The equivalent circuit used for fitting the EIS data to obtain the  $R_{ct}$  values.

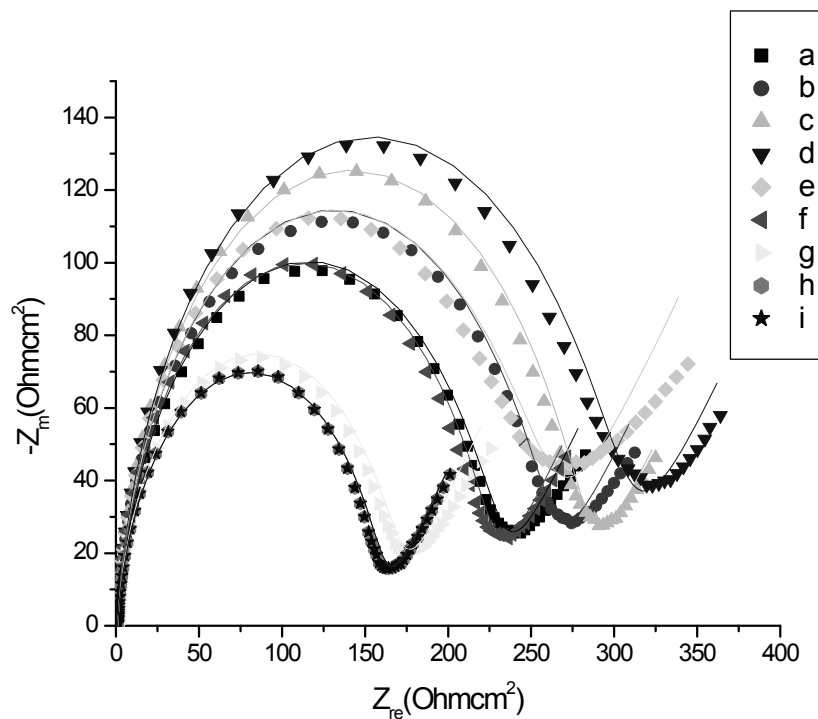

**Fig. S2** Nyquist plots of TLR3-modified Au electrode before (a) and after 5 min incubation with 0.2 (b), 0.3 (c), 0.5 (d), 1 (e), 2 (f), 5 (g), 10 (h) and 20 (i)  $\mu\text{g mL}^{-1}$  of poly (I:C) in the presence of 5 mM  $[\text{Fe}(\text{CN})_6]^{3-/4-}$  in 1 M  $\text{NaClO}_4$  pH 7.0. Data points show experimental results while solid lines represent the spectra calculated for the equivalent circuit shown in scheme 1.

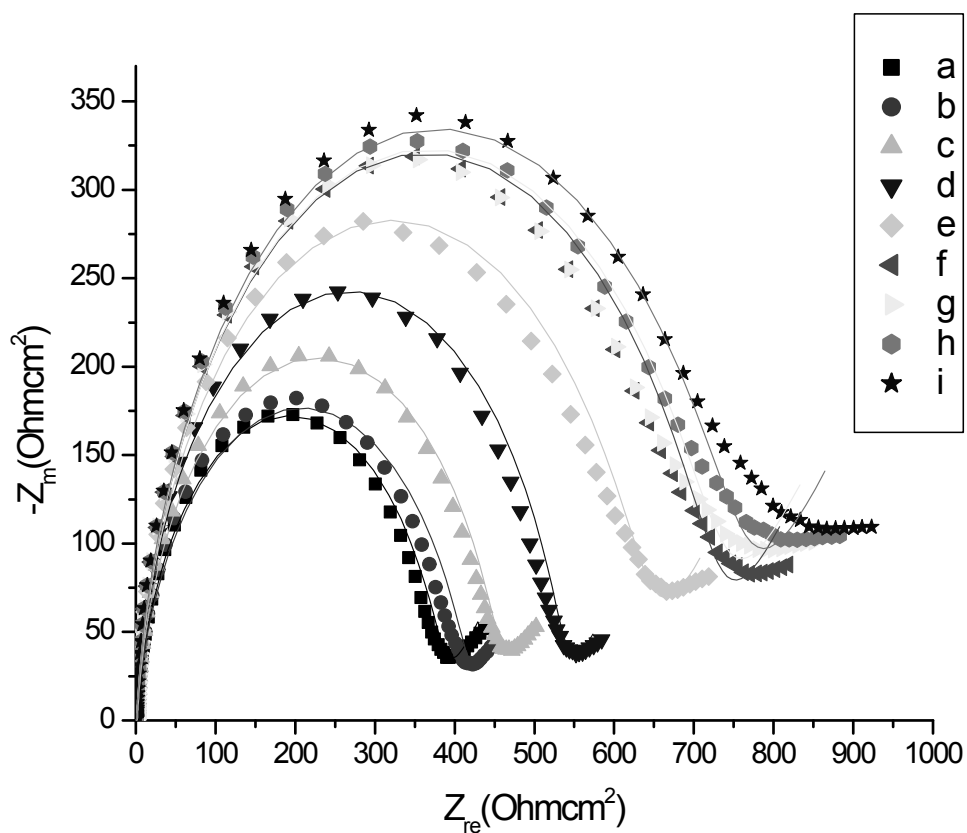

**Fig. S3** Nyquist plots of TLR3-modified Au electrode before (a) and after 5 min incubation with 0.2 (b), 0.3 (c), 0.5 (d), 1 (e), 2 (f), 5 (g), 10 (h) and 20 (i)  $\mu\text{g mL}^{-1}$  of poly (I:C) in the presence of 5 mM  $[\text{Fe}(\text{CN})_6]^{3-/4-}$  in 100 mM Borate buffer pH 6.5. Data points show experimental results while solid lines represent the spectra calculated for the equivalent circuit shown in scheme 1.

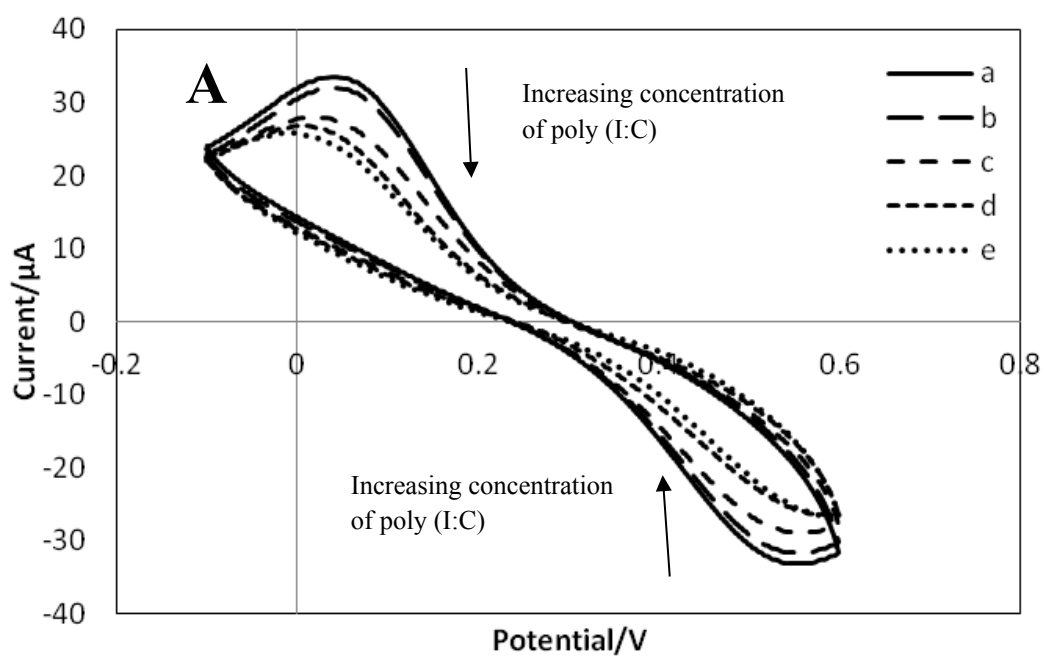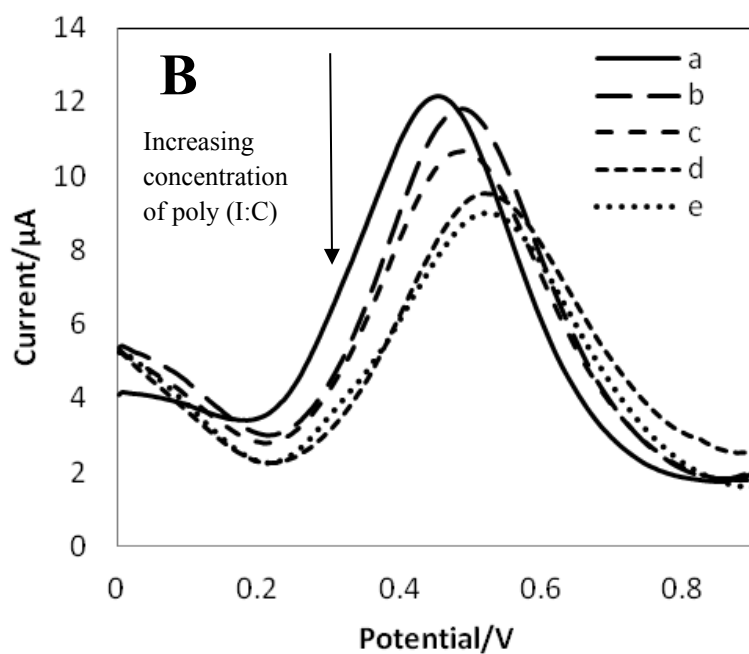

**Fig. S4** A) CVs and B) SWVs obtained for incubation of TLR3-modified Au electrode before (a) and after 5 min incubation with 0.2 (b), 0.3 (c), 0.5 (d) and (e)  $1 \mu\text{g mL}^{-1}$  of poly (I:C) in the presence of 5 mM  $[\text{Fe}(\text{CN})_6]^{3-/4-}$  in 100 mM Borate buffer pH 6.5.

**Table S1.** Equivalent circuit element values for TLR3-modified electrodes after incubation in poly (I:C) solutions at different concentrations at pH 6.5 and pH 7.0. Values in parentheses represent the standard deviation for at least 5 electrode measurements.

| Equivalent circuit elements                             |                               |                                      |                                  |               |                                 |                               |                                      |                                  |              |                                 |
|---------------------------------------------------------|-------------------------------|--------------------------------------|----------------------------------|---------------|---------------------------------|-------------------------------|--------------------------------------|----------------------------------|--------------|---------------------------------|
| Poly (I:C)<br>Concentration<br>( $\mu\text{gml}^{-1}$ ) | pH 6.5                        |                                      |                                  |               |                                 | pH 7.0                        |                                      |                                  |              |                                 |
|                                                         | $R_s$<br>( $\text{Ohmcm}^2$ ) | $C_{dl}$<br>( $\mu\text{Fcm}^{-2}$ ) | $R_{ct}$<br>( $\text{Ohmcm}^2$ ) | $n$           | $Z_w$<br>( $\text{Ohmcm}^2$ )   | $R_s$<br>( $\text{Ohmcm}^2$ ) | $C_{dl}$<br>( $\mu\text{Fcm}^{-2}$ ) | $R_{ct}$<br>( $\text{Ohmcm}^2$ ) | $n$          | $Z_w$<br>( $\text{Ohmcm}^2$ )   |
| <b>0.0</b>                                              | 2.6<br>(0.4)                  | $2.2 \times 10^{-2}$<br>(0.003)      | 351<br>(18)                      | 0.8<br>(0.01) | $1.5 \times 10^{-2}$<br>(0.007) | 1.0<br>(0.2)                  | $2.6 \times 10^{-2}$<br>(0.005)      | 225<br>(2)                       | 0.8<br>(0.2) | $1.5 \times 10^{-2}$<br>(0.002) |
| <b>0.2</b>                                              | 2.5<br>(0.2)                  | $2.8 \times 10^{-2}$<br>(0.005)      | 421<br>(30)                      | 0.8<br>(0.01) | $1.5 \times 10^{-2}$<br>(0.005) | 1.0<br>(0.1)                  | $2.5 \times 10^{-2}$<br>(0.003)      | 255<br>(9)                       | 0.8<br>(0.1) | $1.5 \times 10^{-2}$<br>(0.005) |
| <b>0.3</b>                                              | 2.4<br>(0.1)                  | $2.1 \times 10^{-2}$<br>(0.009)      | 446<br>(30)                      | 0.8<br>(0.03) | $1.6 \times 10^{-2}$<br>(0.003) | 1.0<br>(0.4)                  | $2.6 \times 10^{-2}$<br>(0.006)      | 276<br>(4)                       | 0.8<br>(0.1) | $1.7 \times 10^{-2}$<br>(0.003) |
| <b>0.5</b>                                              | 2.6<br>(0.8)                  | $1.7 \times 10^{-2}$<br>(0.004)      | 529<br>(33)                      | 0.8<br>(0.01) | $1.8 \times 10^{-2}$<br>(0.005) | 1.1<br>(0.5)                  | $2.6 \times 10^{-2}$<br>(0.005)      | 298<br>(5)                       | 0.8<br>(0.3) | $1.6 \times 10^{-2}$<br>(0.002) |
| <b>1.0</b>                                              | 2.7<br>(0.2)                  | $2.4 \times 10^{-2}$<br>(0.003)      | 660<br>(27)                      | 0.8<br>(0.03) | $1.4 \times 10^{-2}$<br>(0.008) | 1.1<br>(0.4)                  | $2.6 \times 10^{-2}$<br>(0.004)      | 258<br>(14)                      | 0.8<br>(0.1) | $1.5 \times 10^{-2}$<br>(0.005) |
| <b>2.0</b>                                              | 2.6<br>(0.5)                  | $1.9 \times 10^{-2}$<br>(0.007)      | 710<br>(31)                      | 0.8<br>(0.01) | $1.5 \times 10^{-2}$<br>(0.006) | 1.1<br>(0.2)                  | $2.8 \times 10^{-2}$<br>(0.008)      | 169<br>(7)                       | 0.8<br>(0.1) | $1.5 \times 10^{-2}$<br>(0.003) |
| <b>5.0</b>                                              | 2.6<br>(0.3)                  | $1.9 \times 10^{-2}$<br>(0.004)      | 721<br>(39)                      | 0.8<br>(0.02) | $1.7 \times 10^{-2}$<br>(0.005) | 1.1<br>(0.6)                  | $2.5 \times 10^{-2}$<br>(0.005)      | 165<br>(8)                       | 0.8<br>(0.1) | $1.5 \times 10^{-2}$<br>(0.006) |
| <b>10</b>                                               | 2.6<br>(0.9)                  | $1.9 \times 10^{-2}$<br>(0.006)      | 746<br>(32)                      | 0.8<br>(0.01) | $1.5 \times 10^{-2}$<br>(0.007) | 1.0<br>(0.3)                  | $2.5 \times 10^{-2}$<br>(0.004)      | 158<br>(4)                       | 0.8<br>(0.2) | $1.6 \times 10^{-2}$<br>(0.006) |
| <b>20</b>                                               | 2.7<br>(0.4)                  | $1.9 \times 10^{-2}$<br>(0.007)      | 760<br>(30)                      | 0.8<br>(0.01) | $1.6 \times 10^{-2}$<br>(0.004) | 1.1<br>(0.5)                  | $2.3 \times 10^{-2}$<br>(0.007)      | 156<br>(6)                       | 0.8<br>(0.1) | $1.5 \times 10^{-2}$<br>(0.005) |
